# Supplementary material for: Selective Growth of WSe2 with Graphene Contacts
Source: Nanoscale Res Lett. 2020 Mar 12;15:61. doi: 10.1186/s11671-020-3261-y (PMC7067944; doi:10.1186/s11671-020-3261-y)
Supplement: Supplementary file 1 — Additional file 1: Figure S1. Scalable synthesis of monolayer WSe2 on sapphire: influence on (a) concentration of the seeding promoters and (b) temperature for the WSe2 growth. Figure S2. Synthesis of the laterally stitched graphene-WS2: (a) optical and (b)AFM image of the graphene-WS2 and (c) PL spectrum of the WS2. Raman mapping of (d) the E2g mode of WS2 and (e) the G’ mode of graphene. (f) PL mapping of the Graphene-WS2. (Scale bar: 4 μm). [file 11671_2020_3261_MOESM1_ESM.docx]

**Supporting Information for**

**Selective Growth of WSe2 with Graphene Contacts**

Yu-Ting Lin,a† Xin-Quan Zhang,b† Po‐Han Chen,b Erh-Chen Lin,b Jian-Guo Rong,b

Yung‐Fu Chen,*a Yi-Hsien Lee*b

*aDepartment of Physics, National Central University, Zhongli 32001, Taiwan*

*bDepartment of Materials Science and Engineering, National Tsing Hua University, Hsinchu 30013, Taiwan*

*E-mail: yfuchen@cc.ncu.edu.tw(Yung‐Fu Chen*a) yhlee.nthu@gmail.com (Yi-Hsien Lee*b)

**
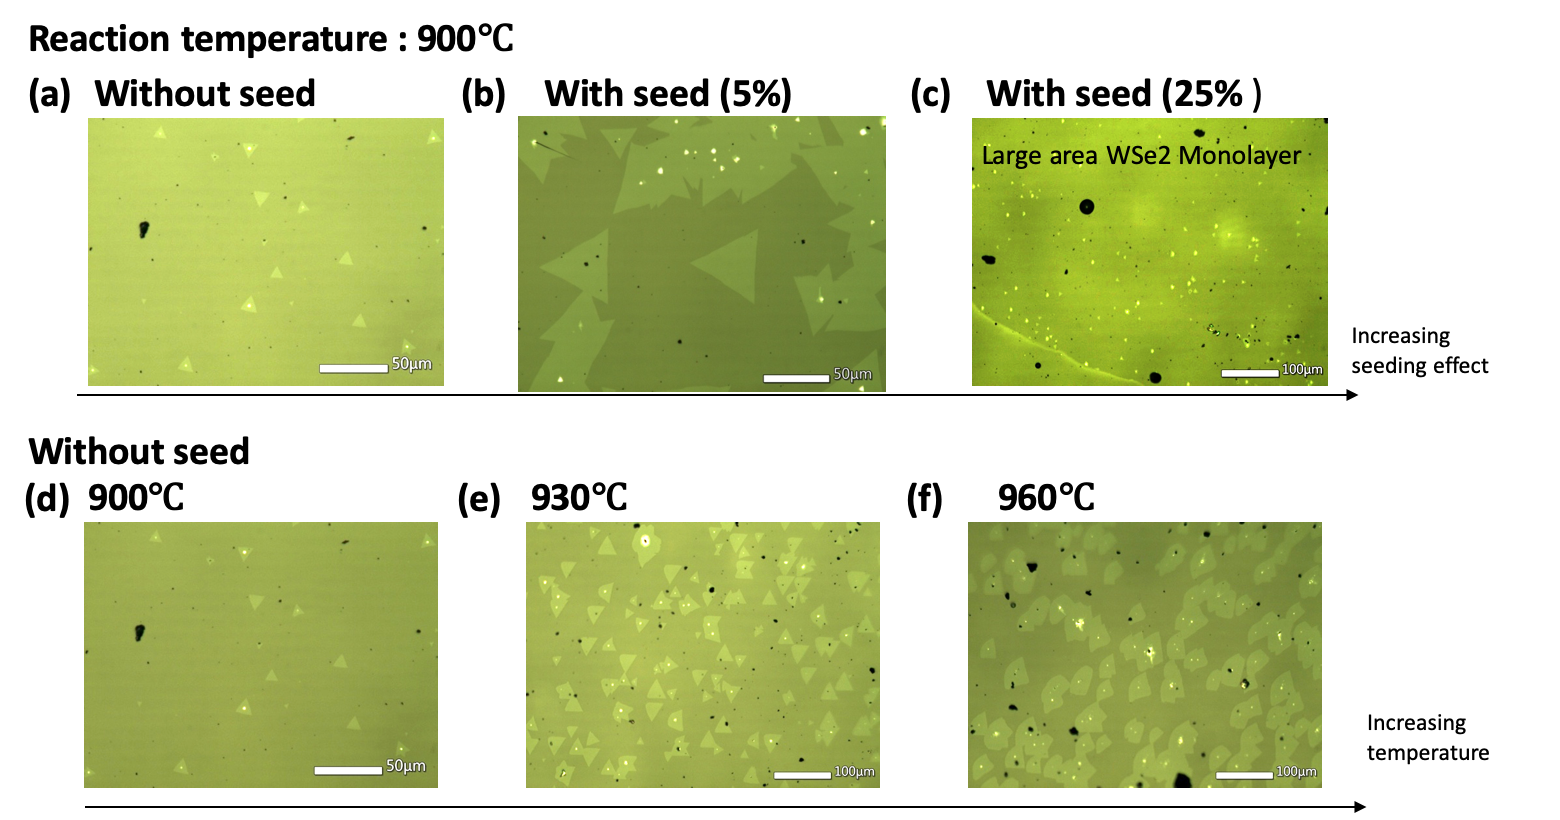
**

Figure S1 Synthesis of large area WSe2 monolayers on sapphire: (a-c) the effect of increasing the concentration of seeding promoters. Large area of WSe2 monolayer could be synthesized by increasing the nucleation concentration. (d-f) Synthesis of WSe2 monolayer without seeding promoters. Substrate-guided growth of irregular WSe2 monolayer was observed and increased temperature would result in increased domain size.

**
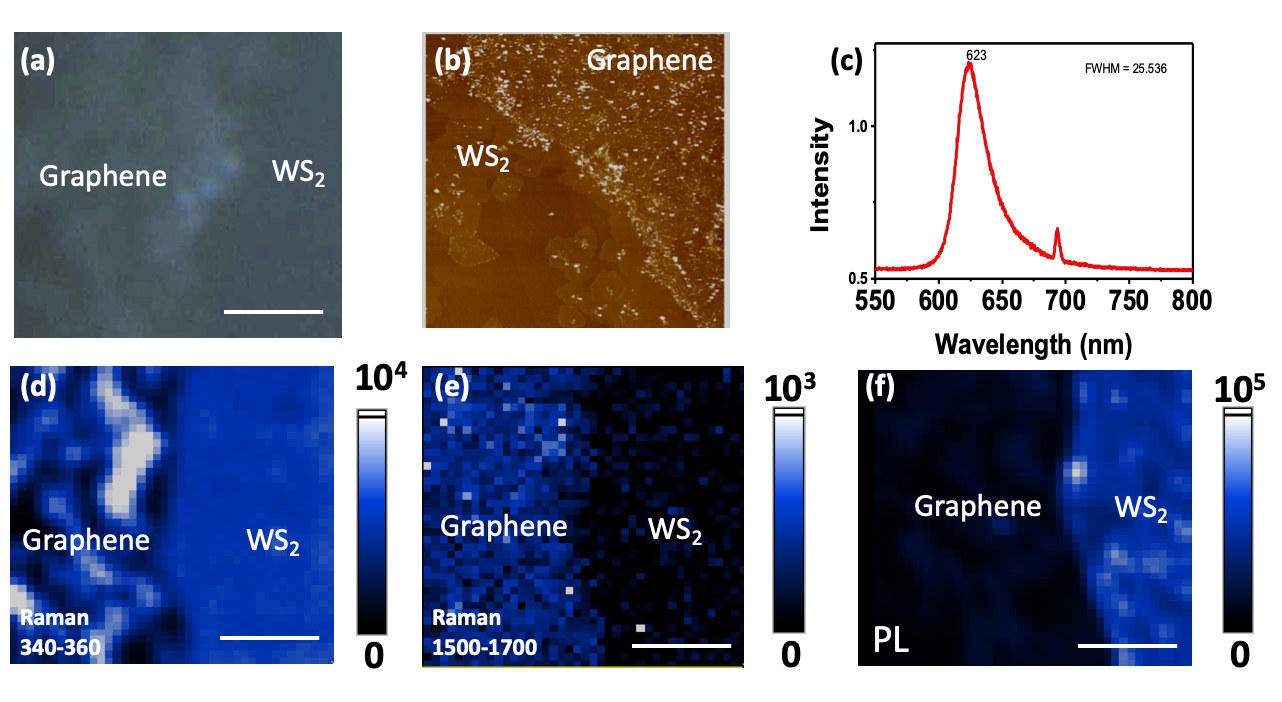
**

Figure S2 Synthesis of monolayer lateral heterostructure of graphene-WS2­: (a) optical image (b)AFM image of graphene-WS2 lateral heterostructures(c) PL spectrum of WS2 monolayer. (d) Raman mapping of E2g mode of WS2 (e)Raman mapping of G’ mode of graphene (f) PL mapping of Graphene-WS2 lateral junctions. Scale bar: 4µm
